# Supplementary material for: Investigation of miR-15b-5p expression and role in head and neck squamous cell carcinoma based on meta-analysis and bioinformatics analysis
Source: Research Square preprint supplement (doi:10.21203/rs.3.rs-3196608/v1), 2023-08-08
Supplement: Supplementary file 1 [file 42b6d23cf19fdb3a14cd642d.docx]

**Table S1.** Predictive genes of miR-15b-5p by GO enrichment analysis.

| **GO ID** | **GO term** | **Gene symbol** | **P-value** |
| --- | --- | --- | --- |
| **Biological process** | | | |
| GO:0030198 | Extracellular matrix organization | LAMC2, COL5A3, LAMA4, TGFBI, LAMC1, CTSV, P3H4, ADAM12, WDR72, FLRT2 | 9.60012E-07 |
| GO:0043062 | Extracellular structure organization | LAMC2, COL5A3, LAMA4, TGFBI, LAMC, CTSV, P3H4, ADAM12, WDR72，FLRT2 | 9.77413E-07 |
| GO:2000298 | regulation of Rho-dependent protein  serine/threonine kinase activity | THY1, SYNPO2 | 7.44873E-05 |
| GO:0051270 | regulation of cellular component movement | DSG2, LAMC2, CEACAM1, TF, AMA4, PLXNA1, EPHB2, THY1, AM107A, SYNPO2, FLRT2 | 9.00541E-05 |
| GO:0051552 | flavone metabolic process | UGT1A10, UGT1A7 | 0.000111533 |
| GO:0009887 | organ morphogenesis | LAMC2, CEACAM1, PLXNA1, HOXD11, PHB2, LAMC1, THY1, TNNI1, WDR72, FLRT2 | 0.000127599 |
| GO:0072358 | cardiovascular system development | DSG2, CEACAM1, LAMA4, TGFBI, LDB3, PHB2, ADAM12, THY1, TNNI1, HSPB7, FLRT2 | 0.000130808 |
| GO:0072359 | circulatory system development | DSG2, CEACAM1, LAMA4, TGFBI, LDB3, PHB2, ADAM12, THY1, TNNI1, HSPB7, FLRT2 | 0.000137434 |
| GO:0044699 | single-organism process | MGST1, DSG2, EIF2AK2, LAMC2, CEACAM1, COL5A3, BIRC5, TF, MYBL2, UPK1A, CTSC, LAMA4, PLXNA1, CENPA, KYNU, TGFBI, NCAPH, LDB3, HOXD11, EPHB2, LAMC1, SCRN1, TTYH3, CTSV, RDH12, P3H4, GULP1, ADAM12, THY1, ENAH, MARVELD1, TNNI1, GPX8, WDR72, MAP4K2, FAM107A, GATM, ID4, SYNPO2, PARP14, CKS1B, HSPB7, LYNX1, FLRT2, TRDN, SERPINB13, PAX9, UGT1A10, UGT1A7 | 0.000157112 |
| GO:0048731 | system development | MGST1, DSG2, EIF2AK2, LAMC2, CEACAM1, COL5A3, TF, CTSC, LAMA4, PLXNA1, TGFBI, LDB3, HOXD11, EPHB2, LAMC1, CTSV, ADAM12, THY1, ENAH, MARVELD1, TNNI1, WDR72, HSPB7, FLRT2, SERPINB13, PAX9 | 0.000169068 |
| **Cellular component** | | | |
| GO:0044420 | extracellular matrix component | LAMC2, COL5A3, LAMA4, TGFBI, LAMC1 | 0.0000293 |
| GO:0005578 | proteinaceous extracellular matrix | LAMC2, COL5A3, LAMA4, TGFBI, LAMC1 | 0.0000367 |
| GO:0005604 | basement membrane | LAMC2, LAMA4, TGFBI, LAMC1 | 0.000168278 |
| GO:0070161 | anchoring junction | DSG2, CEACAM1, LDB3, THY1, ENAH, AM107A, SYNPO2, FLRT2 | 0.000196634 |
| GO:0045177 | apical part of cell | CEACAM7, MGST1, CEACAM1, TF, UPK1A, TSV, THY1 | 0.00021179 |
| GO:0005788 | endoplasmic reticulum lumen | COL5A3, TF, CTSC, LAMC1, GPX8, TRDN | 0.000253169 |
| GO:0005783 | endoplasmic reticulum | MGST1, COL5A3, TF, UPK1A, CTSC, LAMC1, RDH12, P3H4, THY1, GPX8, LYNX1, FLRT2, TRDN, UGT1A10, UGT1A7 | 0.000325909 |
| GO:0031012 | extracellular matrix | LAMC2, COL5A3, LAMA4, TGFBI, LAMC1, FLRT2 | 0.000406882 |
| GO:0005605 | basal lamina | LAMC2, LAMC1 | 0.000517818 |
| GO:0043256 | laminin complex | LAMC2, LAMC1 | 0.000517818 |
| **Molecular function** | | | |
| GO:0031005 | filamin binding | CEACAM1, SYNPO2, HSPB7 | 5.96824E-06 |
| GO:0005201 | extracellular matrix structural constituent | LAMC2, COL5A3, LAMA4, TGFBI, LAMC1 | 0.000112938 |
| GO:0005080 | protein kinase C binding | LDB3, UGT1A10, UGT1A7 | 0.000503488 |
| GO:0051371 | muscle alpha-actinin binding | LDB3, SYNPO2 | 0.000803385 |
| GO:0005518 | collagen binding | COL5A3, TGFBI, P3H4 | 0.001019666 |
| GO:0004602 | glutathione peroxidase activity | MGST1, GPX8 | 0.001589433 |
| GO:0003779 | actin binding | CEACAM1, LDB3, ENAH, TNNI1, SYNPO2, AM107A | 0.001608262 |
| GO:0019901 | protein kinase binding | LDB3, THY1, MAP4K2, CKS1B, UGT1A10, UGT1A7, CEACAM1 | 0.002806109 |
| GO:0051393 | alpha-actinin binding | LDB3, SYNPO2 | 0.00282504 |
| GO:0015067 | amidinotransferase activity | GATM | 0.002826087 |

Notes: GO: Gene Ontology；Only top 10 was were presented in the table.
